# Supplementary material for: Atmospheric formation of the NO3 radical from gas-phase reaction of HNO3 acid with the NH2 radical: proton-coupled electron-transfer versus hydrogen atom transfer mechanisms
Source: Royal Society of Chemistry journal article supplement (doi:10.1039/c4cp02792b), 2014-01-01
Supplement: c4cp02792b1.pdf [file c4cp02792b1.pdf]

# Atmospheric Formation of NO<sub>3</sub> Radical from Gas-Phase Reaction of HNO<sub>3</sub> Acid with NH<sub>2</sub> Radical. Proton-Coupled Electron-Transfer versus Hydrogen Atom Transfer Mechanisms.

*Josep M. Anglada,<sup>\*a</sup> Santiago Olivella<sup>a</sup> and Albert Solé<sup>b</sup>*

- a) Departament de Química Biològica i Modelització Molecular, (IQAC – CSIC), Jordi Girona, 18-26, E-08034 Barcelona, Catalonia, Spain. E-mail: [anglada@iqac.csic.es](mailto:anglada@iqac.csic.es).
- b) Departament de Química Física i Institut de Química Teòrica i Computacional (IQTUB). Universitat de Barcelona, Martí i Franqués, 1, E-08028 Barcelona, Catalonia, Spain

## Supporting information

This supporting information contains a Figure containing the most relevant geometrical parameters of the different stationary points optimized in this works, tables including the absolute energies, and the Cartesian coordinates of the stationary points investigated.

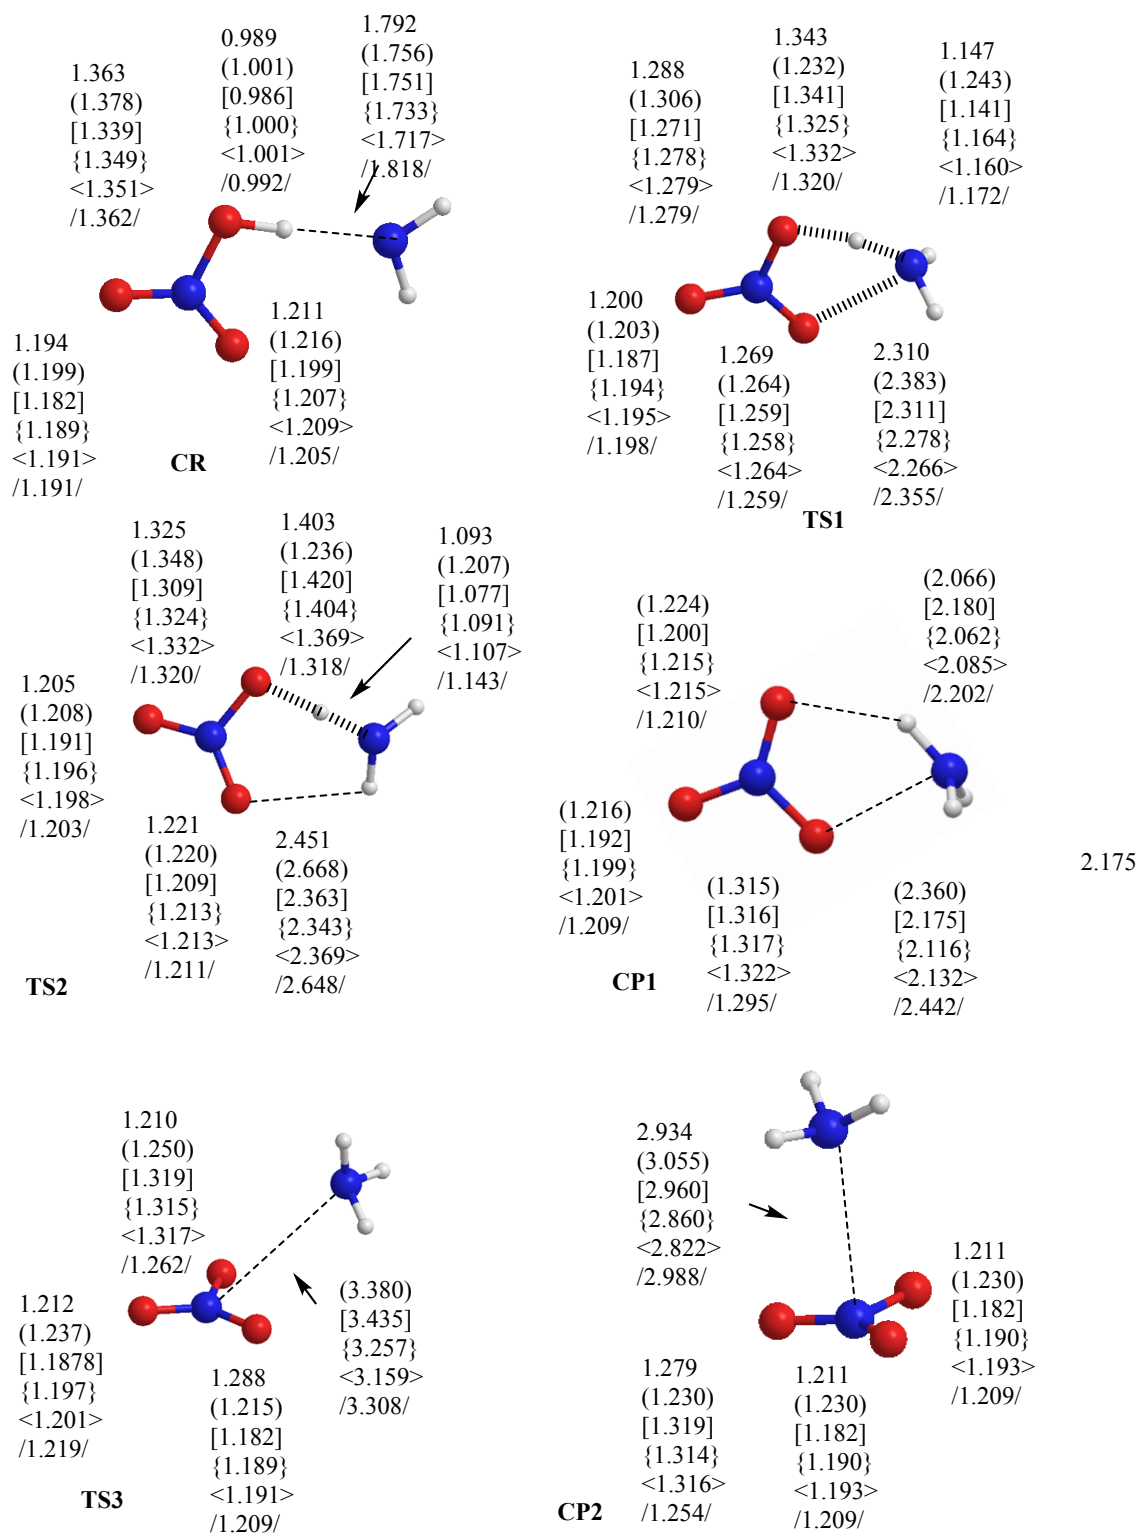

**Figure S1:** Selected geometrical parameters for the stationary points computed using the 6-311+G(2df,2p) basis set.. Plain text stands for QCISD; values in parenthesis stand for B3LYP; values in square brackets stand for BH&HLYP; values in braces stand for M05-2X; values in angle brackets stand for M06-2X; values in slashes stand for M05.

**Table S1:** Absolute energies (in hartree) computed at the geometry optimized at B3LYP level of theory

| <b>Compound</b>        | <b>B3LYP/<br/>6-311+G(2df,2p)</b> | <b>HF/<br/>aug-cc-pVTZ</b> | <b>CCSD(T)/<br/>aug-cc-pVTZ</b> | <b>HF/<br/>aug-cc-pVQZ</b> | <b>CCSD(T)/<br/>aug-cc-pVQZ</b> |
|------------------------|-----------------------------------|----------------------------|---------------------------------|----------------------------|---------------------------------|
| <b>HNO<sub>3</sub></b> | -280.99675                        | -279.56269                 | -280.54488                      | -279.58163                 | -280.61844                      |
| <b>NH<sub>2</sub></b>  | -55.90398                         | -55.58793                  | -55.79984                       | -55.59126                  | -55.81307                       |
| <b>CR</b>              | -336.91676                        | -335.16505                 | -336.36161                      | -335.18713                 | -336.44829                      |
| <b>TS1</b>             | -336.90870                        | -335.13769                 | -336.34659                      | -335.15961                 | -336.43352                      |
| <b>CP1</b>             | -336.92075                        | -335.12908                 | -336.34721                      | -335.15145                 | -336.43429                      |
| <b>TS2</b>             | -336.90452                        | -335.13322                 | -336.34048                      | --                         | --                              |
| <b>TS3</b>             | -336.91467                        | -335.14074                 | -336.34942                      | -335.16333                 | -336.43612                      |
| <b>CP2</b>             | -336.91708                        | -335.10251                 | -336.35615                      | -335.12506                 | -336.44305                      |
| <b>NO<sub>3</sub></b>  | -280.32651                        | -278.87800                 | -279.86908                      | -278.89701                 | -279.94108                      |
| <b>NH<sub>3</sub></b>  | -56.58647                         | -56.22031                  | -56.48050                       | -56.22396                  | -56.49568                       |

**Table S2:** Absolute energies (in hartree) computed at the geometry optimized at BH&HLYP level of theory

| <b>Compound</b>                        | <b>BH&amp;HLYP/<br/>6-311+G(2df,2p)</b> | <b>HF/<br/>aug-cc-pVTZ</b> | <b>CCSD(T)/<br/>aug-cc-pVTZ</b> | <b>HF/<br/>aug-cc-pVQZ</b> | <b>CCSD(T)/<br/>aug-cc-pVQZ</b> |
|----------------------------------------|-----------------------------------------|----------------------------|---------------------------------|----------------------------|---------------------------------|
| <b>HNO<sub>3</sub></b>                 | -280.83621                              | -279.56936                 | -280.54207                      | -279.58863                 | -280.61640                      |
| <b>NH<sub>2</sub></b>                  | -55.87094                               | -55.58836                  | -55.79962                       | -55.59172                  | -55.81293                       |
| <b>CR</b>                              | -336.72489                              | -335.17145                 | -336.35882                      | -335.19386                 | -336.44628                      |
| <b>TS1</b>                             | -336.70666                              | -335.138526                | -336.34261                      | -335.16075                 | -336.43029                      |
| <b>CP1</b>                             | -336.71462                              | -335.13950                 | -336.34884                      | -335.16203                 | -336.43644                      |
| <b>TS2</b>                             | -336.70960                              | -335.15635                 | -336.34720                      | -335.17902                 | -336.43440                      |
| <b>CP2</b>                             | -336.71235                              | -335.15878                 | -336.3510                       | -335.18148                 | -336.43813                      |
| <b>NH<sub>3</sub></b>                  | -56.54516                               | -56.22076                  | -56.48018                       | -56.22444                  | -56.49545                       |
| <b>NO<sub>3</sub> (D<sub>3h</sub>)</b> | -280.15194                              | -278.88456                 | -279.86575                      | -278.90387                 | -279.93844                      |
| <b>NO<sub>3</sub> (2S1L)</b>           | -280.16195                              | -278.93462                 | -279.86411                      | -278.95375                 | -279.93628                      |
| <b>NO<sub>3</sub> (2L1S)</b>           | -280.15779                              | -278.90821                 | -279.86538                      | -278.92747                 | -279.93779                      |

**Table S3:** Absolute energies (in hartree) computed at the geometry optimized at QCISD level of theory

| Compound                           | QCISD/          | HF/         | CCSD(T)/    | HF/         | CCSD(T)/    |
|------------------------------------|-----------------|-------------|-------------|-------------|-------------|
|                                    | 6-311+G(2df,2p) | aug-cc-pVTZ | aug-cc-pVTZ | aug-cc-pVQZ | aug-cc-pVQZ |
| HNO <sub>3</sub>                   | -280.46591      | -279.56536  | -280.54459  | -279.58440  | -280.61839  |
| NH <sub>2</sub>                    | -55.78411       | -55.58807   | -55.79983   | -55.59140   | -55.81308   |
| CR                                 | -336.26657      | -335.16800  | -336.36129  | -335.19021  | -336.44823  |
| TS1                                | -336.24711      | -335.13499  | -336.34496  | -335.15699  | -336.43214  |
| TS3                                | -336.25787      | -335.15048  | -336.34937  | -335.17308  | -336.43622  |
| CP2                                | -336.26254      | -335.15054  | -336.35378  | -335.17313  | -336.44054  |
| NH <sub>3</sub>                    | -56.46136       | -56.22042   | -56.48052   | -56.22407   | -56.49571   |
| NO <sub>3</sub> (D <sub>3h</sub> ) | -279.78382      | -278.87997  | -279.86870  | -278.89904  | -279.94086  |
| NO <sub>3</sub> (2S1L)             | -279.79481      | -278.92712  | -279.86650  | -278.94616  | -279.93835  |
| NO <sub>3</sub> (2L1S)             | -279.78926      | -278.90416  | -279.86776  | -278.92321  | -279.93981  |

**Table S4:** Absolute energies (in hartree) computed at the geometry optimized at M05-2X level of theory

| Compound                           | QCISD/          | HF/         | CCSD(T)/    |
|------------------------------------|-----------------|-------------|-------------|
|                                    | 6-311+G(2df,2p) | aug-cc-pVTZ | aug-cc-pVTZ |
| HNO <sub>3</sub> .                 | -280.94978      | -279.56759  | -280.54363  |
| NH <sub>2</sub>                    | -55.88580       | -55.58823   | -55.79976   |
| NH <sub>3</sub>                    | -56.56840       | -56.22059   | -56.48038   |
| CR                                 | -336.85395      | -335.16919  | -336.36038  |
| TS1                                | -336.84209      | -335.13636  | -336.34417  |
| TS2                                | -336.83306      | -335.12482  | -336.33618  |
| CP1                                | -336.84990      | -335.13309  | -336.35019  |
| TS3                                | -336.83885      | -335.15419  | -336.348523 |
| CP2                                | -336.84201      | -335.15700  | -336.35241  |
| NO <sub>3</sub> (D <sub>3h</sub> ) | -280.26275      | -278.88291  | -279.86736  |
| NO <sub>3</sub> (2S1L)             | -280.26655      | -278.93355  | -279.86531  |
| NO <sub>3</sub> (2L1S)             | -280.26527      | -278.90703  | -279.86661  |

**Table S5:** Absolute energies (in hartree) computed at the geometry optimized at M06-2X level of theory

| <b>Compound</b>                        | <b>QCISD/<br/>6-311+G(2df,2p)</b> | <b>HF/<br/>aug-cc-pVTZ</b> | <b>CCSD(T)/<br/>aug-cc-pVTZ</b> |
|----------------------------------------|-----------------------------------|----------------------------|---------------------------------|
| <b>HNO<sub>3</sub></b>                 | -280.88361                        | -279.56703                 | -280.54393                      |
| <b>NH<sub>2</sub></b>                  | -55.86850                         | -55.58804                  | -55.79983                       |
| <b>CR</b>                              | -336.77089                        | -335.16824                 | -336.360707                     |
| <b>TS1</b>                             | -336.75614                        | -335.13510                 | -336.34457                      |
| <b>TS2</b>                             | -336.74827                        | -335.12507                 | -336.336617                     |
| <b>CP1</b>                             | -336.76524                        | -335.13382                 | -336.35067                      |
| <b>TS3</b>                             | -336.75491                        | -335.15293                 | -336.348782                     |
| <b>CP2</b>                             | -336.75826                        | -335.15609                 | -336.35275                      |
| <b>NH<sub>3</sub></b>                  | -56.54961                         | -56.22036                  | -56.48052                       |
| <b>NO<sub>3</sub> (D<sub>3h</sub>)</b> | -280.19724                        | -278.88224                 | -279.86779                      |
| <b>NO<sub>3</sub> (2S1L)2</b>          | -280.20072                        | -278.93317                 | -279.86560                      |
| <b>NO<sub>3</sub> (2L1S)</b>           | -280.20075                        | -278.90672                 | -279.86683                      |

**Table S6:** Absolute energies (in hartree) computed at the geometry optimized at M05 level of theory

| <b>Compound</b>                        | <b>QCISD/<br/>6-311+G(2df,2p)</b> | <b>HF/<br/>aug-cc-pVTZ</b> | <b>CCSD(T)/<br/>aug-cc-pVTZ</b> |
|----------------------------------------|-----------------------------------|----------------------------|---------------------------------|
| <b>HNO<sub>3</sub></b>                 | -280.87669                        | -279.56629                 | -280.54415                      |
| <b>NH<sub>2</sub></b>                  | -55.86010                         | -55.58818                  | -55.79979                       |
| <b>CR</b>                              | -336.75352                        | -335.16904                 | -336.36081                      |
| <b>TS1</b>                             | -336.74064                        | -335.13774                 | -336.34402                      |
| <b>TS2</b>                             | -336.73596                        | -335.13104                 | -336.33597                      |
| <b>CP1</b>                             | -336.75150                        | -335.13575                 | -336.34551                      |
| <b>TS3</b>                             | -336.74699                        | -335.14818                 | -336.34940                      |
| <b>CP2</b>                             | -336.74958                        | -335.14935                 | -336.35302                      |
| <b>NH<sub>3</sub></b>                  | -56.53889                         | -56.22047                  | -56.48050                       |
| <b>NO<sub>3</sub> (D<sub>3h</sub>)</b> | -280.20449                        | -278.88291                 | -279.86736                      |
| <b>NO<sub>3</sub> (2S1L)</b>           | -280.20457                        | -278.92584                 | -279.86582                      |

NO<sub>3</sub> (2L1S)                    -280.20449                    -278.90703                    -279.86661

**Table S7:** Cartesian coordinates of all the stationary points investigated in this work.

**Geometries optimized at B3LYP/6-311+G(2df,2p)**

HNO<sub>3</sub>

|   |           |           |          |
|---|-----------|-----------|----------|
| N | 0.000000  | 0.154713  | 0.000000 |
| O | -0.266837 | -1.230038 | 0.000000 |
| O | 1.168014  | 0.462155  | 0.000000 |
| O | -0.978490 | 0.836034  | 0.000000 |
| H | 0.618501  | -1.628203 | 0.000000 |

NH<sub>2</sub>

|   |          |           |           |
|---|----------|-----------|-----------|
| N | 0.000000 | 0.000000  | 0.141287  |
| H | 0.000000 | 0.806177  | -0.494506 |
| H | 0.000000 | -0.806177 | -0.494506 |

CR

|   |           |           |           |
|---|-----------|-----------|-----------|
| O | 2.027114  | -0.207949 | 0.000138  |
| N | 0.860957  | 0.072451  | 0.000003  |
| O | 0.349039  | 1.175093  | -0.000034 |
| O | 0.005548  | -1.008425 | -0.000149 |
| H | -0.919496 | -0.625299 | -0.000295 |
| N | -2.566367 | -0.016996 | 0.000026  |
| H | -2.694503 | 0.998003  | -0.000450 |
| H | -3.501739 | -0.430649 | 0.000904  |

TS1

|   |           |           |           |
|---|-----------|-----------|-----------|
| O | -0.007808 | 1.911151  | 0.000000  |
| N | 0.000000  | 0.707809  | 0.000000  |
| O | 1.065550  | 0.028555  | 0.000000  |
| O | -1.123684 | 0.041909  | 0.000000  |
| H | -0.707697 | -1.118263 | 0.000000  |
| N | 0.031246  | -2.117783 | 0.000000  |
| H | 0.508259  | -2.432417 | 0.838398  |
| H | 0.508259  | -2.432417 | -0.838398 |

#### TS2

|   |           |           |           |
|---|-----------|-----------|-----------|
| O | -1.934873 | -0.303939 | 0.025770  |
| N | -0.781560 | 0.055643  | 0.003504  |
| O | -0.368233 | 1.203208  | -0.007717 |
| O | 0.123052  | -0.943626 | -0.011244 |
| H | 1.249738  | -0.489850 | -0.241086 |
| N | 2.342721  | -0.002278 | -0.082198 |
| H | 2.280889  | 0.973365  | 0.204434  |
| H | 2.981681  | -0.502212 | 0.533047  |

#### CPI1

|   |           |           |          |
|---|-----------|-----------|----------|
| O | 0.444123  | 1.889946  | 0.000000 |
| N | 0.000000  | 0.758282  | 0.000000 |
| O | 0.912518  | -0.188765 | 0.000000 |
| O | -1.183572 | 0.444879  | 0.000000 |
| H | -0.906536 | -1.601994 | 0.000000 |
| N | -0.164990 | -2.287981 | 0.000000 |
| H | 0.338460  | -2.429295 | 0.857928 |

H 0.338460 -2.429295 -0.857928

TS3

O -0.026127 0.052947 -0.032427

N 0.099035 0.021604 1.175744

O 1.226554 0.053402 1.714058

O -0.858508 -0.035653 1.957129

H 3.262345 -1.821449 0.034017

N 2.326587 -2.184517 -0.087627

H 1.862948 -1.658834 -0.817005

H 2.384025 -3.156153 -0.362387

CP2

O -0.081020 0.416238 0.028914

N 0.217451 -0.017732 1.140726

O 1.139784 0.493869 1.773813

O -0.418854 -0.951706 1.627117

H 3.129142 -1.788896 0.141879

N 2.174443 -1.988543 -0.131917

H 2.139072 -1.954755 -1.143776

H 1.976571 -2.943103 0.143635

NO<sub>3</sub>

N 0.000000 0.000000 0.000000

O 0.000000 1.231447 0.000000

O 1.066465 -0.615724 0.000000



O -1.066465 -0.615724 0.000000

NH<sub>3</sub>

N 0.000000 0.110832 0.000000

H 0.471489 -0.258677 0.816567

H -0.942978 -0.258470 0.000000

H 0.471489 -0.258677 -0.816567

**Geometries optimized at BH&HLYP/6-311+G(2df,2p)**

HNO<sub>3</sub>

N 0.000000 0.141825 0.000000

O -0.283453 -1.190215 0.000000

O 1.157727 0.426542 0.000000

O -0.946169 0.841592 0.000000

H 0.575160 -1.616130 0.000000

NH<sub>2</sub>

N 0.000000 0.000000 0.138762

H 0.000000 0.800792 -0.485667

H 0.000000 -0.800792 -0.485667

NH<sub>3</sub>

N 0.000000 0.107292 0.000000

H 0.468663 -0.251341 0.810745

H -0.937326 -0.248362 0.000000

H 0.468663 -0.251341 -0.810745

NO<sub>3</sub> D<sub>3h</sub>, <sup>2</sup>A<sub>2</sub>'

N 0.000000 0.000000 0.000000

O 0.000000 1.208811 0.000000

O 1.046861 -0.604405 0.000000

O -1.046861 -0.604405 0.000000

NO<sub>3</sub> C<sub>2v</sub>, <sup>2</sup>B<sub>2</sub> (2S1L)

N 0.000000 0.000000 -0.089900

O 0.000000 1.077305 -0.577118

O 0.000000 -1.077305 -0.577118

O 0.000000 0.000000 1.232898

NO<sub>3</sub> C<sub>2v</sub>, <sup>2</sup>B<sub>2</sub> (2L1S)

N 0.000000 0.000000 0.076925

O 0.000000 0.000000 1.248815

O 0.000000 0.998613 -0.658062

O 0.000000 -0.998613 -0.658062

**CR**

O -0.251312 2.098473 -0.057676

N -0.002218 0.943891 -0.112380

O 0.972364 0.421508 -0.576315

O -0.930467 0.133458 0.411426

H -0.597435 -0.788097 0.297619

N -0.017937 -2.428080 0.091917

H -0.345135 -3.361288 0.307014

H 0.882535 -2.523815 -0.361606

**TS1**

O 0.047357 1.882257 0.000000

N 0.000000 0.695733 0.000000

O 1.031122 -0.010971 0.000000

|   |           |           |           |
|---|-----------|-----------|-----------|
| 8 | -1.115272 | 0.087004  | 0.000000  |
| H | -0.697288 | -1.187604 | 0.000000  |
| N | 0.008671  | -2.083374 | 0.000000  |
| H | 0.465465  | -2.382620 | 0.842849  |
| H | 0.465465  | -2.382620 | -0.842849 |

### **CP1**

|   |           |           |           |
|---|-----------|-----------|-----------|
| O | 0.136160  | 1.925020  | -0.003723 |
| N | -0.046427 | 0.747301  | 0.001231  |
| O | 1.060674  | 0.036369  | -0.000438 |
| O | -1.105936 | 0.183015  | 0.007301  |
| H | -0.479585 | -1.905425 | -0.005129 |
| N | 0.507437  | -2.066842 | -0.001166 |
| H | 0.864953  | -2.468932 | 0.840369  |
| H | 0.872005  | -2.471476 | -0.838446 |

### **TS2**

|   |           |           |           |
|---|-----------|-----------|-----------|
| O | 0.002872  | 0.018346  | 0.002844  |
| N | 0.000704  | 0.006459  | 1.184939  |
| O | 1.184721  | 0.020816  | 1.765587  |
| O | -0.900981 | -0.006631 | 1.956050  |
| H | 3.393384  | -1.953259 | -0.169428 |
| N | 2.400970  | -2.084895 | -0.106099 |
| H | 1.977387  | -1.658931 | -0.909703 |
| H | 2.217802  | -3.070557 | -0.142689 |

### **CP2**

|   |          |           |           |
|---|----------|-----------|-----------|
| O | 0.697398 | -0.961750 | -0.758016 |
| N | 0.712098 | 0.013680  | -0.090796 |
| O | 0.790078 | -0.213685 | 1.206295  |

|   |           |           |           |
|---|-----------|-----------|-----------|
| O | 0.689851  | 1.158290  | -0.385334 |
| H | -2.692916 | 0.588888  | 0.712218  |
| N | -2.244064 | -0.014896 | 0.048200  |
| H | -2.657248 | -0.925298 | 0.134445  |
| H | -2.457397 | 0.330595  | -0.869751 |

**Geometries optimized at QCISD/6-311+G(2df,2p)**

HNO<sub>3</sub>

|   |           |           |          |
|---|-----------|-----------|----------|
| N | 0.000000  | 0.147570  | 0.000000 |
| O | -0.280955 | -1.210716 | 0.000000 |
| O | 1.170713  | 0.438477  | 0.000000 |
| O | -0.964604 | 0.844563  | 0.000000 |
| H | 0.598768  | -1.611577 | 0.000000 |

NH<sub>2</sub>

|   |          |           |           |
|---|----------|-----------|-----------|
| N | 0.000000 | 0.000000  | 0.141274  |
| H | 0.000000 | 0.802427  | -0.494460 |
| H | 0.000000 | -0.802427 | -0.494460 |

**CR**

|   |           |           |           |
|---|-----------|-----------|-----------|
| O | -2.023162 | -0.177139 | -0.000370 |
| N | -0.855723 | 0.073169  | -0.000047 |
| O | -0.316161 | 1.157826  | -0.000080 |
| O | -0.035663 | -1.015730 | 0.000261  |
| H | 0.881869  | -0.646362 | 0.000389  |
| N | 2.562131  | -0.024572 | 0.000245  |
| H | 2.664189  | 0.991333  | -0.000454 |
| H | 3.508975  | -0.404808 | 0.000196  |

**TS1**

|   |          |          |          |
|---|----------|----------|----------|
| O | 0.058481 | 1.896274 | 0.000000 |
|---|----------|----------|----------|

|   |           |           |           |
|---|-----------|-----------|-----------|
| N | 0.000000  | 0.698195  | 0.000000  |
| O | 1.042634  | -0.024624 | 0.000000  |
| O | -1.134416 | 0.088784  | 0.000000  |
| H | -0.698549 | -1.181417 | 0.000000  |
| N | 0.004007  | -2.087705 | 0.000000  |
| H | 0.468452  | -2.387745 | 0.846819  |
| H | 0.468452  | -2.387745 | -0.846819 |

### **TS2**

|   |           |           |           |
|---|-----------|-----------|-----------|
| O | -2.167811 | -0.083779 | 0.064667  |
| N | -0.964730 | 0.046424  | -0.007575 |
| O | -0.282236 | -1.044674 | -0.054475 |
| O | -0.348900 | 1.087735  | -0.040831 |
| H | 2.306557  | 0.721468  | -0.217254 |
| N | 2.853615  | -0.094740 | 0.022166  |
| H | 3.653042  | -0.110901 | -0.596819 |
| H | 3.209778  | 0.053388  | 0.957047  |

### **CP2**

|   |           |           |           |
|---|-----------|-----------|-----------|
| O | -0.711301 | 1.078326  | -0.607285 |
| N | -0.736921 | -0.000624 | -0.057821 |
| O | -0.823213 | 0.001882  | 1.218720  |
| O | -0.707245 | -1.081154 | -0.603499 |
| H | 2.596935  | -0.876118 | 0.345855  |
| N | 2.195516  | 0.001240  | 0.042028  |
| H | 2.615915  | 0.726367  | 0.608275  |
| H | 2.511061  | 0.153008  | -0.907062 |

### **NH<sub>3</sub>**

|   |          |          |          |
|---|----------|----------|----------|
| N | 0.000000 | 0.112590 | 0.000000 |
|---|----------|----------|----------|

H 0.469269 -0.262703 0.812809

H -0.938538 -0.262726 0.000000

H 0.469269 -0.262703 -0.812809

NO<sub>3</sub> D<sub>3h</sub>, <sup>2</sup>A'<sub>2</sub>

N 0.000000 0.000000 0.000000

O 0.000000 1.226095 0.000000

O 1.061830 -0.613048 0.000000

O -1.061830 -0.613048 0.000000

NO<sub>3</sub>- C<sub>2v</sub>, <sup>2</sup>B<sub>2</sub> (2S1L)

N 0.000000 0.000000 -0.048723

O 0.000000 1.081110 -0.595636

O 0.000000 -1.081110 -0.595636

O 0.000000 0.000000 1.233906

NO<sub>3</sub>- C<sub>2v</sub>, <sup>2</sup>B<sub>2</sub> (2L1S)

N 0.000000 0.000000 0.062548

O 0.000000 0.000000 1.255497

O 0.000000 1.023321 -0.655113

O 0.000000 -1.023321 -0.655113

### Geometry optimized at M05-2X/6-311+G(2df,2p)

HNO<sub>3</sub>

N -0.001116 0.145516 0.000000

O -0.288900 -1.198873 0.000000

O 1.163812 0.427649 0.000000

O -0.951998 0.849573 0.000000

H 0.581467 -1.620251 0.000000

NH<sub>2</sub>

N 0.000000 0.000000 0.137214

H 0.000000 0.802663 -0.492430

H 0.000000 -0.802663 -0.492430

NH<sub>3</sub>

N 0.000088 0.101760 -0.000033

H 0.470428 -0.259089 0.815056

H -0.940994 -0.259140 0.000040

H 0.470478 -0.259073 -0.815063

NO<sub>3</sub> D<sub>3h</sub>, <sup>2</sup>A'<sub>2</sub>

N 0.000000 0.000000 -0.000102

O 0.000000 0.000000 1.216239

O 1.053457 0.000000 -0.608069

O -1.053457 0.000000 -0.608069

NO<sub>3</sub> C<sub>2v</sub>, <sup>2</sup>B<sub>2</sub> (2S1L)

N 0.000000 0.000000 -0.085489

O 0.000000 1.083281 -0.579234

O 0.000000 -1.083281 -0.579234

O 0.000000 0.000000 1.233271

NO<sub>3</sub> C<sub>2v</sub>, <sup>2</sup>B<sub>2</sub> (2L1S)

N 0.000000 0.000000 0.073733

|   |          |           |           |
|---|----------|-----------|-----------|
| O | 0.000000 | 0.000000  | 1.254654  |
| O | 0.000000 | 1.005586  | -0.659585 |
| O | 0.000000 | -1.005586 | -0.659585 |

CR

|   |           |           |           |
|---|-----------|-----------|-----------|
| O | -2.022799 | -0.219616 | -0.250325 |
| N | -0.869061 | 0.031087  | -0.110944 |
| O | -0.362860 | 1.108169  | 0.087958  |
| O | -0.034660 | -1.025576 | -0.186863 |
| H | 0.884269  | -0.657047 | -0.048941 |
| N | 2.437259  | 0.062857  | 0.219228  |
| H | 2.384797  | 1.070597  | 0.350577  |
| H | 3.413866  | -0.205466 | 0.305694  |

TS1

|   |           |           |           |
|---|-----------|-----------|-----------|
| O | 0.062189  | 1.874469  | -0.000007 |
| N | -0.002361 | 0.682644  | -0.000002 |
| O | 1.027079  | -0.040663 | 0.000001  |
| O | -1.132511 | 0.085947  | -0.000001 |
| H | -0.721331 | -1.173176 | 0.000003  |
| N | 0.009643  | -2.078873 | 0.000006  |
| H | 0.481406  | -2.366290 | 0.844251  |
| H | 0.481406  | -2.366254 | -0.844252 |

TS2

|   |           |           |           |
|---|-----------|-----------|-----------|
| O | -1.885136 | -0.264496 | 0.082018  |
| N | -0.733458 | 0.049433  | 0.000867  |
| O | -0.297231 | 1.179928  | -0.057719 |



|   |          |           |           |
|---|----------|-----------|-----------|
| O | 0.130765 | -0.953279 | -0.028458 |
| H | 1.387109 | -0.500737 | -0.461737 |
| N | 2.260410 | 0.011471  | -0.055004 |
| H | 2.017817 | 0.953750  | 0.227217  |
| H | 2.745975 | -0.499001 | 0.670599  |

#### CP1

|   |           |           |           |
|---|-----------|-----------|-----------|
| O | 0.174452  | 1.799219  | 0.000057  |
| N | -0.100222 | 0.631770  | 0.000120  |
| O | 0.937020  | -0.179468 | 0.000307  |
| O | -1.220773 | 0.162451  | -0.000381 |
| H | -0.760523 | -1.847290 | -0.000578 |
| N | 0.196225  | -2.161788 | -0.000111 |
| H | 0.553714  | -2.547673 | 0.854077  |
| H | 0.554575  | -2.547716 | -0.853917 |

#### TS3

|   |           |           |           |
|---|-----------|-----------|-----------|
| O | 0.017964  | 0.006044  | -0.038047 |
| N | 0.064370  | -0.039952 | 1.149096  |
| O | 1.253356  | 0.044583  | 1.704135  |
| O | -0.815803 | -0.138291 | 1.954144  |
| H | 3.322154  | -1.913543 | -0.050688 |
| N | 2.322304  | -2.036907 | -0.084323 |
| H | 1.981797  | -1.624344 | -0.938944 |
| H | 2.130717  | -3.026240 | -0.113873 |

#### CP2

|   |           |           |           |
|---|-----------|-----------|-----------|
| O | 0.633391  | -0.973827 | -0.752166 |
| N | 0.661866  | 0.011420  | -0.085356 |
| O | 0.763671  | -0.204316 | 1.206934  |
| O | 0.634200  | 1.160472  | -0.394739 |
| H | -2.664868 | 0.582254  | 0.718202  |
| N | -2.194704 | -0.013482 | 0.054238  |
| H | -2.606902 | -0.931572 | 0.118724  |
| H | -2.388854 | 0.344875  | -0.868576 |

**Geometry optimized at M06-2X/6-311+G(2df,2p)**

HNO<sub>3</sub>

|   |           |           |          |
|---|-----------|-----------|----------|
| N | -0.000182 | 0.146465  | 0.000000 |
| O | -0.289739 | -1.199873 | 0.000000 |
| O | 1.166397  | 0.430804  | 0.000000 |
| O | -0.954149 | 0.850145  | 0.000000 |
| H | 0.580938  | -1.623927 | 0.000000 |

NH<sub>2</sub>

|   |          |           |           |
|---|----------|-----------|-----------|
| N | 0.000000 | 0.000000  | 0.140603  |
| H | 0.000000 | 0.804238  | -0.494124 |
| H | 0.000000 | -0.804238 | -0.494124 |

CR

|   |           |           |           |
|---|-----------|-----------|-----------|
| O | -1.919428 | -0.220745 | -0.075050 |
| N | -0.757071 | 0.035887  | -0.039673 |
| O | -0.235159 | 1.125704  | -0.085400 |
| O | 0.066308  | -1.030696 | 0.065064  |

|   |          |           |          |
|---|----------|-----------|----------|
| H | 0.995023 | -0.656278 | 0.077246 |
| N | 2.543300 | 0.086431  | 0.086999 |
| H | 2.497727 | 1.106674  | 0.063603 |
| H | 3.529994 | -0.173941 | 0.088685 |

TS1

|   |           |           |           |
|---|-----------|-----------|-----------|
| O | 0.067360  | 1.875237  | -0.000005 |
| N | -0.005411 | 0.682494  | -0.000002 |
| O | 1.027049  | -0.046784 | 0.000002  |
| O | -1.138254 | 0.088576  | -0.000005 |
| H | -0.725284 | -1.177664 | 0.000003  |
| N | 0.012408  | -2.072744 | 0.000007  |
| H | 0.483830  | -2.365671 | 0.846980  |
| H | 0.483823  | -2.365638 | -0.846981 |

TS2

|   |           |           |           |
|---|-----------|-----------|-----------|
| O | -1.890406 | -0.270209 | 0.078096  |
| N | -0.739480 | 0.051332  | -0.002392 |
| O | -0.301606 | 1.181796  | -0.043897 |
| O | 0.126987  | -0.958489 | -0.052079 |
| H | 1.361929  | -0.505747 | -0.429881 |
| N | 2.272054  | 0.008679  | -0.065639 |
| H | 2.042750  | 0.959346  | 0.216404  |
| H | 2.754022  | -0.489638 | 0.677170  |

CP1

|   |          |          |          |
|---|----------|----------|----------|
| O | 0.175299 | 1.803926 | 0.000007 |
|---|----------|----------|----------|

|   |           |           |           |
|---|-----------|-----------|-----------|
| N | -0.101303 | 0.634865  | -0.000011 |
| O | 0.943195  | -0.175458 | 0.000002  |
| O | -1.220976 | 0.162335  | -0.000036 |
| H | -0.769767 | -1.873701 | 0.000020  |
| N | 0.195235  | -2.171844 | -0.000006 |
| H | 0.538783  | -2.581407 | 0.852954  |
| H | 0.538769  | -2.581453 | -0.852924 |

TS3

|   |           |           |           |
|---|-----------|-----------|-----------|
| O | -0.024131 | -0.073401 | -0.056252 |
| N | 0.084895  | -0.079232 | 1.129380  |
| O | 1.287121  | 0.116378  | 1.629389  |
| O | -0.748241 | -0.219970 | 1.982446  |
| H | 3.308452  | -1.990457 | 0.026667  |
| N | 2.301076  | -1.986334 | -0.065729 |
| H | 2.071942  | -1.545832 | -0.947595 |
| H | 1.995746  | -2.949804 | -0.116804 |

CP2

|   |           |           |           |
|---|-----------|-----------|-----------|
| O | 0.634780  | -0.978171 | -0.751230 |
| N | 0.648604  | 0.010929  | -0.085154 |
| O | 0.721548  | -0.201550 | 1.211117  |
| O | 0.624676  | 1.161044  | -0.399976 |
| H | -2.627179 | 0.578840  | 0.728004  |
| N | -2.170939 | -0.013752 | 0.046236  |
| H | -2.589958 | -0.932298 | 0.117492  |
| H | -2.403732 | 0.350781  | -0.869228 |

NH<sub>3</sub>

|   |           |           |           |
|---|-----------|-----------|-----------|
| N | 0.000061  | 0.110527  | -0.000041 |
| H | 0.470347  | -0.262017 | 0.814906  |
| H | -0.940855 | -0.262055 | 0.000072  |
| H | 0.470448  | -0.261998 | -0.814938 |

NO<sub>3</sub> D<sub>3h</sub>, <sup>2</sup>A'<sub>2</sub>

|   |           |          |           |
|---|-----------|----------|-----------|
| N | 0.000000  | 0.000000 | 0.000000  |
| O | 0.000000  | 0.000000 | 1.218913  |
| O | 1.055376  | 0.000000 | -0.609565 |
| O | -1.055376 | 0.000000 | -0.609565 |

NO<sub>3</sub> C<sub>2v</sub>, <sup>2</sup>B<sub>2</sub> (2S1L)

|   |          |           |           |
|---|----------|-----------|-----------|
| N | 0.000000 | 0.000000  | -0.085476 |
| O | 0.000000 | 1.085286  | -0.580550 |
| O | 0.000000 | -1.085286 | -0.580550 |
| O | 0.000000 | 0.000000  | 1.235891  |

NO<sub>3</sub> C<sub>2v</sub>, <sup>2</sup>B<sub>2</sub> (2L1S)

|   |          |           |           |
|---|----------|-----------|-----------|
| N | 0.000000 | 0.000000  | 0.077553  |
| O | 0.000000 | 0.000000  | 1.259401  |
| O | 0.000000 | 1.004543  | -0.663630 |
| O | 0.000000 | -1.004543 | -0.663630 |

**Geometry optimized at M05/6-311+G(2df,2p)**

HNO<sub>3</sub>

|   |           |           |          |
|---|-----------|-----------|----------|
| N | 0.002378  | 0.153406  | 0.000000 |
| O | -0.290732 | -1.205170 | 0.000000 |
| O | 1.167920  | 0.433177  | 0.000000 |
| O | -0.956088 | 0.849829  | 0.000000 |
| H | 0.579786  | -1.627628 | 0.000000 |

NH<sub>2</sub>

|   |          |           |           |
|---|----------|-----------|-----------|
| N | 0.000000 | 0.000000  | 0.140647  |
| H | 0.000000 | 0.801387  | -0.492263 |
| H | 0.000000 | -0.801387 | -0.492263 |

CR

|   |           |           |          |
|---|-----------|-----------|----------|
| O | 2.023360  | -0.183736 | 0.000000 |
| N | 0.860679  | 0.072681  | 0.000000 |
| O | 0.327846  | 1.153653  | 0.000000 |
| O | 0.039024  | -1.013910 | 0.000000 |
| H | -0.886079 | -0.657095 | 0.000000 |
| N | -2.589388 | -0.021417 | 0.000000 |
| H | -2.675517 | 0.993679  | 0.000000 |
| H | -3.539373 | -0.387625 | 0.000000 |

TS1

|   |           |           |           |
|---|-----------|-----------|-----------|
| O | 0.034124  | 1.910808  | 0.000017  |
| N | -0.002458 | 0.713351  | 0.000007  |
| O | 1.046659  | 0.018199  | -0.000018 |
| O | -1.117504 | 0.087354  | 0.000021  |
| H | -0.693235 | -1.162693 | -0.000015 |
| N | 0.013096  | -2.098213 | -0.000022 |
| H | 0.462403  | -2.425454 | 0.842354  |
| H | 0.462435  | -2.425547 | -0.842344 |

TS2

|   |           |           |           |
|---|-----------|-----------|-----------|
| O | -1.957498 | -0.314791 | -0.021438 |
| N | -0.810887 | 0.047711  | -0.025817 |

|   |           |           |           |
|---|-----------|-----------|-----------|
| O | -0.410987 | 1.190987  | -0.051468 |
| O | 0.079332  | -0.926968 | -0.000946 |
| H | 1.286913  | -0.469412 | -0.266336 |
| N | 2.307219  | 0.003409  | -0.062805 |
| H | 2.208685  | 0.960659  | 0.255426  |
| H | 2.923476  | -0.514525 | 0.551166  |

#### CP1

|   |           |           |           |
|---|-----------|-----------|-----------|
| O | 0.474949  | 1.898895  | -0.000010 |
| N | -0.002040 | 0.787490  | 0.000011  |
| O | 0.880274  | -0.161068 | -0.000001 |
| O | -1.178297 | 0.504773  | 0.000007  |
| H | -0.923177 | -1.682469 | -0.000006 |
| N | -0.179980 | -2.360580 | -0.000001 |
| H | 0.353363  | -2.415630 | 0.848170  |
| H | 0.353370  | -2.415633 | -0.848169 |

#### TS3

|   |           |           |           |
|---|-----------|-----------|-----------|
| O | -0.112204 | -0.043100 | -0.024717 |
| N | 0.071423  | -0.017879 | 1.161596  |
| O | 1.242047  | 0.109861  | 1.614899  |
| O | -0.782516 | -0.095738 | 2.027315  |
| H | 3.322089  | -1.966350 | 0.048628  |
| N | 2.329665  | -2.092659 | -0.081385 |
| H | 2.045250  | -1.554781 | -0.886614 |
| H | 2.161105  | -3.068005 | -0.278221 |



## CP2

|   |           |           |           |
|---|-----------|-----------|-----------|
| O | 0.715346  | -0.859632 | -0.874585 |
| N | 0.737516  | 0.010853  | -0.036133 |
| O | 0.779724  | -0.350515 | 1.163490  |
| O | 0.737160  | 1.199463  | -0.254644 |
| H | -2.671567 | 0.716116  | 0.587701  |
| N | -2.249616 | -0.001780 | 0.015813  |
| H | -2.632554 | -0.884409 | 0.323758  |
| H | -2.578208 | 0.145729  | -0.928139 |

NH<sub>3</sub>

|   |           |           |           |
|---|-----------|-----------|-----------|
| N | 0.000000  | 0.111741  | 0.000000  |
| H | 0.468970  | -0.262415 | 0.812454  |
| H | -0.937967 | -0.262452 | 0.000000  |
| H | 0.468970  | -0.262415 | -0.812454 |

NO<sub>3</sub> D<sub>3h</sub>, <sup>2</sup>A'<sub>2</sub>

|   |           |          |           |
|---|-----------|----------|-----------|
| N | 0.000000  | 0.000000 | -0.000270 |
| O | 0.000000  | 0.000000 | 1.222292  |
| O | 1.058968  | 0.000000 | -0.611011 |
| O | -1.058968 | 0.000000 | -0.611011 |

NO<sub>3</sub> C<sub>2v</sub>, <sup>2</sup>B<sub>2</sub> (2S1L)

|   |          |           |           |
|---|----------|-----------|-----------|
| N | 0.000000 | 0.000000  | -0.040437 |
| O | 0.000000 | 1.076702  | -0.590468 |
| O | 0.000000 | -1.076702 | -0.590468 |
| O | 0.000000 | 0.000000  | 1.216318  |

NO<sub>3</sub> C<sub>2v</sub>, <sup>2</sup>B<sub>2</sub> (2L1S)

|   |          |           |           |
|---|----------|-----------|-----------|
| N | 0.000000 | 0.000000  | -0.055564 |
| O | 0.000000 | 0.000000  | 1.153494  |
| O | 0.000000 | 1.046654  | -0.701545 |
| O | 0.000000 | -1.046654 | -0.701545 |
